# Supplementary material for: Reproduction of Varroa destructor depends on well-timed host cell recapping and seasonal patterns
Source: Springer Nature journal article supplement (doi:10.1038/s41598-023-49688-9), 2023-12-18
Supplement: 41598_2023_49688_MOESM1_ESM.pdf [file 41598_2023_49688_MOESM1_ESM.pdf]

## Supplementary Information

### Reproduction of *Varroa destructor* depends on well-timed host cell recapping and seasonal patterns

Authors: Martin Gabel<sup>1,2\*</sup>, Ricarda Scheiner<sup>2</sup>, Ingolf Steffan-Dewenter<sup>3</sup> & Ralph Böhler<sup>1</sup>

<sup>1</sup>Landesbetrieb Landwirtschaft Hessen, Bee Institute Kirchhain, Erlenstraße 9, 35274 Kirchhain, Germany

<sup>2</sup>Department of Behavioral Physiology and Sociobiology, Biocenter, University of Würzburg, 97074 Würzburg, Germany

<sup>3</sup>Department of Animal Ecology and Tropical Biology, Biocenter, University of Würzburg, 97074 Würzburg, Germany

\*Corresponding author, Mail: [MartinSebastian.Gabel@lh.hessen.de](mailto:MartinSebastian.Gabel@lh.hessen.de)

**Supplementary Information Table 4:** Pairwise comparisons of the occurrence of MNR in single infested cells over the study period. Factors denoted in bold indicate significant differences between groups ( $p < 0.05$ ; Tukey-Method adjusted for comparing 15 estimates and averaged over recapping status of cells).

| Contrast                       | Estimate      | Z             | p                |
|--------------------------------|---------------|---------------|------------------|
| April 2019 - June 2019         | -0.029        | -0.109        | 1.000            |
| April 2019 - July 2019         | -0.314        | -1.246        | 0.996            |
| April 2019 - August 2019       | -0.645        | -2.593        | 0.375            |
| April 2019 - September 2019    | -0.705        | -2.730        | 0.286            |
| <b>April 2019 - April 2020</b> | <b>-1.524</b> | <b>-5.344</b> | <b>&lt;0.001</b> |
| <b>April 2019 - June 2020</b>  | <b>-1.362</b> | <b>-5.401</b> | <b>&lt;0.001</b> |

|                                   |               |               |                  |
|-----------------------------------|---------------|---------------|------------------|
| April 2019 -<br>July 2020         | -0.637        | -2.679        | 0.318            |
| April 2019 -<br>August<br>2020    | 0.028         | 0.117         | 1.000            |
| April 2019 -<br>September<br>2020 | -0.605        | -2.520        | 0.426            |
| <b>April 2019 -<br/>May 2021</b>  | <b>-1.032</b> | <b>-3.780</b> | <b>0.013</b>     |
| <b>April 2019 -<br/>June 2021</b> | <b>-1.540</b> | <b>-4.900</b> | <b>&lt;0.001</b> |
| April 2019 -<br>July 2021         | -0.502        | -1.907        | 0.850            |
| April 2019 -<br>August<br>2021    | -0.246        | -0.989        | 1.000            |
| April 2019 -<br>September<br>2021 | -0.581        | -2.370        | 0.538            |
| June 2019 -<br>July 2019          | -0.285        | -1.420        | 0.986            |
| June 2019 -<br>August<br>2019     | -0.617        | -3.118        | 0.112            |
| June 2019 -<br>September<br>2019  | -0.676        | -3.221        | 0.084            |
| <b>June 2019 -<br/>April 2020</b> | <b>-1.495</b> | <b>-6.092</b> | <b>&lt;0.001</b> |
| <b>June 2019 -<br/>June 2020</b>  | <b>-1.333</b> | <b>-6.459</b> | <b>&lt;0.001</b> |
| June 2019 -<br>July 2020          | -0.609        | -3.258        | 0.075            |
| June 2019 -<br>August<br>2020     | 0.057         | 0.296         | 1.000            |

|                                   |               |               |                  |
|-----------------------------------|---------------|---------------|------------------|
| June 2019 -<br>September<br>2020  | -0.576        | -3.040        | 0.138            |
| <b>June 2019 -<br/>May 2021</b>   | <b>-1.003</b> | <b>-4.345</b> | <b>0.001</b>     |
| <b>June 2019 -<br/>June 2021</b>  | <b>-1.511</b> | <b>-5.422</b> | <b>&lt;0.001</b> |
| June 2019 -<br>July 2021          | -0.473        | -2.153        | 0.698            |
| June 2019 -<br>August<br>2021     | -0.218        | -1.067        | 0.999            |
| June 2019 -<br>September<br>2021  | -0.553        | -2.775        | 0.260            |
| July 2019 -<br>August<br>2019     | -0.332        | -1.881        | 0.863            |
| July 2019 -<br>September<br>2019  | -0.391        | -2.057        | 0.764            |
| <b>July 2019 -<br/>April 2020</b> | <b>-1.210</b> | <b>-5.256</b> | <b>&lt;0.001</b> |
| <b>July 2019 -<br/>June 2020</b>  | <b>-1.048</b> | <b>-5.518</b> | <b>&lt;0.001</b> |
| July 2019 -<br>July 2020          | -0.324        | -1.944        | 0.831            |
| July 2019 -<br>August<br>2020     | 0.342         | 1.978         | 0.812            |
| July 2019 -<br>September<br>2020  | -0.291        | -1.709        | 0.931            |
| July 2019 -<br>May 2021           | -0.718        | -3.335        | 0.060            |
| <b>July 2019 -<br/>June 2021</b>  | <b>-1.226</b> | <b>-4.603</b> | <b>&lt;0.001</b> |

|                                              |               |               |              |
|----------------------------------------------|---------------|---------------|--------------|
| July 2019 -<br>July 2021                     | -0.188        | -0.922        | 1.000        |
| July 2019 -<br>August<br>2021                | 0.067         | 0.357         | 1.000        |
| July 2019 -<br>September<br>2021             | -0.268        | -1.468        | 0.981        |
| August<br>2019 -<br>September<br>2019        | -0.059        | -0.324        | 1.000        |
| <b>August<br/>2019 - April<br/>2020</b>      | <b>-0.879</b> | <b>-3.867</b> | <b>0.009</b> |
| <b>August<br/>2019 - June<br/>2020</b>       | <b>-0.716</b> | <b>-3.859</b> | <b>0.010</b> |
| August<br>2019 - July<br>2020                | 0.008         | 0.048         | 1.000        |
| <b>August<br/>2019 -<br/>August<br/>2020</b> | <b>0.674</b>  | <b>4.008</b>  | <b>0.005</b> |
| August<br>2019 -<br>September<br>2020        | 0.040         | 0.244         | 1.000        |
| August<br>2019 - May<br>2021                 | -0.387        | -1.824        | 0.889        |
| <b>August<br/>2019 - June<br/>2021</b>       | <b>-0.895</b> | <b>-3.395</b> | <b>0.049</b> |
| August<br>2019 - July<br>2021                | 0.143         | 0.716         | 1.000        |

|                                                 |               |               |              |
|-------------------------------------------------|---------------|---------------|--------------|
| August<br>2019 -<br>August<br>2021              | 0.399         | 2.174         | 0.684        |
| August<br>2019 -<br>September<br>2021           | 0.064         | 0.360         | 1.000        |
| <b>September<br/>2019 - April<br/>2020</b>      | <b>-0.819</b> | <b>-3.458</b> | <b>0.040</b> |
| September<br>2019 - June<br>2020                | -0.657        | -3.339        | 0.059        |
| September<br>2019 - July<br>2020                | 0.067         | 0.384         | 1.000        |
| <b>September<br/>2019 -<br/>August<br/>2020</b> | <b>0.733</b>  | <b>4.057</b>  | <b>0.004</b> |
| September<br>2019 -<br>September<br>2020        | 0.100         | 0.561         | 1.000        |
| September<br>2019 - May<br>2021                 | -0.327        | -1.473        | 0.980        |
| September<br>2019 - June<br>2021                | -0.835        | -3.076        | 0.126        |
| September<br>2019 - July<br>2021                | 0.203         | 0.963         | 1.000        |
| September<br>2019 -<br>August<br>2021           | 0.458         | 2.360         | 0.545        |
| September<br>2019 -                             | 0.123         | 0.652         | 1.000        |

|                                    |              |              |                              |
|------------------------------------|--------------|--------------|------------------------------|
| September 2021                     |              |              |                              |
| April 2020 - June 2020             | 0.162        | 0.708        | 1.000                        |
| <b>April 2020 - July 2020</b>      | <b>0.886</b> | <b>4.187</b> | <b>0.003</b>                 |
| <b>April 2020 - August 2020</b>    | <b>1.552</b> | <b>7.189</b> | <b>6.87293555401425 e-11</b> |
| <b>April 2020 - September 2020</b> | <b>0.919</b> | <b>4.318</b> | <b>0.001</b>                 |
| April 2020 - May 2021              | 0.492        | 1.962        | 0.821                        |
| April 2020 - June 2021             | -0.016       | -0.055       | 1.000                        |
| <b>April 2020 - July 2021</b>      | <b>1.022</b> | <b>4.266</b> | <b>0.002</b>                 |
| <b>April 2020 - August 2021</b>    | <b>1.278</b> | <b>5.733</b> | <b>&lt;0.001</b>             |
| <b>April 2020 - September 2021</b> | <b>0.943</b> | <b>4.291</b> | <b>0.002</b>                 |
| <b>June 2020 - July 2020</b>       | <b>0.724</b> | <b>4.387</b> | <b>0.001</b>                 |
| <b>June 2020 - August 2020</b>     | <b>1.390</b> | <b>8.157</b> | <b>&lt;0.001</b>             |
| <b>June 2020 - September 2020</b>  | <b>0.757</b> | <b>4.521</b> | <b>0.001</b>                 |
| June 2020 - May 2021               | 0.330        | 1.551        | 0.968                        |
| June 2020 - June 2021              | -0.178       | -0.676       | 1.000                        |

|                                                 |               |               |                  |
|-------------------------------------------------|---------------|---------------|------------------|
| <b>June 2020 -<br/>July 2021</b>                | <b>0.860</b>  | <b>4.299</b>  | <b>0.002</b>     |
| <b>June 2020 -<br/>August<br/>2021</b>          | <b>1.115</b>  | <b>6.146</b>  | <b>&lt;0.001</b> |
| <b>June 2020 -<br/>September<br/>2021</b>       | <b>0.780</b>  | <b>4.414</b>  | <b>0.001</b>     |
| <b>July 2020 -<br/>August<br/>2020</b>          | <b>0.666</b>  | <b>4.528</b>  | <b>0.001</b>     |
| July 2020 -<br>September<br>2020                | 0.033         | 0.228         | 1.000            |
| July 2020 -<br>May 2021                         | -0.394        | -2.022        | 0.786            |
| <b>July 2020 -<br/>June 2021</b>                | <b>-0.903</b> | <b>-3.606</b> | <b>0.025</b>     |
| July 2020 -<br>July 2021                        | 0.136         | 0.748         | 1.000            |
| July 2020 -<br>August<br>2021                   | 0.391         | 2.428         | 0.494            |
| July 2020 -<br>September<br>2021                | 0.056         | 0.361         | 1.000            |
| <b>August<br/>2020 -<br/>September<br/>2020</b> | <b>-0.633</b> | <b>-4.233</b> | <b>0.002</b>     |
| <b>August<br/>2020 - May<br/>2021</b>           | <b>-1.060</b> | <b>-5.303</b> | <b>&lt;0.001</b> |
| <b>August<br/>2020 - June<br/>2021</b>          | <b>-1.568</b> | <b>-6.175</b> | <b>&lt;0.001</b> |

|                                     |               |               |              |
|-------------------------------------|---------------|---------------|--------------|
| August 2020 - July 2021             | -0.530        | -2.849        | 0.221        |
| August 2020 - August 2021           | -0.275        | -1.653        | 0.947        |
| <b>August 2020 - September 2021</b> | <b>-0.610</b> | <b>-3.789</b> | <b>0.013</b> |
| September 2020 - May 2021           | -0.427        | -2.159        | 0.695        |
| <b>September 2020 - June 2021</b>   | <b>-0.935</b> | <b>-3.708</b> | <b>0.017</b> |
| September 2020 - July 2021          | 0.103         | 0.561         | 1.000        |
| September 2020 - August 2021        | 0.359         | 2.207         | 0.660        |
| September 2020 - September 2021     | 0.024         | 0.149         | 1.000        |
| May 2021 - June 2021                | -0.508        | -1.879        | 0.864        |
| May 2021 - July 2021                | 0.530         | 2.494         | 0.445        |
| <b>May 2021 - August 2021</b>       | <b>0.785</b>  | <b>3.955</b>  | <b>0.007</b> |
| May 2021 - September 2021           | 0.450         | 2.331         | 0.567        |



|                                           |              |              |                  |
|-------------------------------------------|--------------|--------------|------------------|
| <b>June 2021 -<br/>July 2021</b>          | <b>1.038</b> | <b>3.955</b> | <b>0.007</b>     |
| <b>June 2021 -<br/>August<br/>2021</b>    | <b>1.294</b> | <b>5.148</b> | <b>&lt;0.001</b> |
| <b>June 2021 -<br/>September<br/>2021</b> | <b>0.959</b> | <b>3.880</b> | <b>0.009</b>     |
| July 2021 -<br>August<br>2021             | 0.256        | 1.390        | 0.988            |
| July 2021 -<br>September<br>2021          | -0.079       | -0.444       | 1.000            |
| August<br>2021 -<br>September<br>2021     | -0.335       | -2.111       | 0.728            |

**Supplementary Information Table 5:** Pairwise comparisons of the occurrence of infertile mother mites in single infested cells over the study period. Factors denoted in bold indicate significant differences between groups ( $p < 0.05$ ; Tukey-Method adjusted for comparing 15 estimates and averaged over recapping status of cells).

| <b>Contrast</b>                            | <b>Estimate</b> | <b>Z</b>      | <b>p</b>     |
|--------------------------------------------|-----------------|---------------|--------------|
| April 2019 -<br>June 2019                  | 0.611           | 1.453         | 0.982        |
| April 2019 -<br>July 2019                  | -0.204          | -0.553        | 1.000        |
| April 2019 -<br>August<br>2019             | -0.791          | -2.255        | 0.624        |
| <b>April 2019 -<br/>September<br/>2019</b> | <b>-1.308</b>   | <b>-3.705</b> | <b>0.017</b> |
| April 2019 -<br>April 2020                 | -0.953          | -2.427        | 0.494        |
| April 2019 -<br>June 2020                  | -0.408          | -1.129        | 0.999        |

|                                           |               |               |                  |
|-------------------------------------------|---------------|---------------|------------------|
| April 2019 -<br>July 2020                 | -0.495        | -1.450        | 0.983            |
| April 2019 -<br>August<br>2020            | 0.225         | 0.630         | 1.000            |
| April 2019 -<br>September<br>2020         | -0.770        | -2.269        | 0.614            |
| <b>April 2019 -<br/>May 2021</b>          | <b>-1.307</b> | <b>-3.523</b> | <b>0.033</b>     |
| <b>April 2019 -<br/>June 2021</b>         | <b>-1.415</b> | <b>-3.505</b> | <b>0.035</b>     |
| April 2019 -<br>July 2021                 | -0.488        | -1.295        | 0.994            |
| April 2019 -<br>August<br>2021            | -0.780        | -2.232        | 0.641            |
| April 2019 -<br>September<br>2021         | -0.583        | -1.654        | 0.947            |
| June 2019 -<br>July 2019                  | -0.814        | -2.345        | 0.556            |
| <b>June 2019 -<br/>August<br/>2019</b>    | <b>-1.402</b> | <b>-4.235</b> | <b>0.002</b>     |
| <b>June 2019 -<br/>September<br/>2019</b> | <b>-1.919</b> | <b>-5.750</b> | <b>&lt;0.001</b> |
| <b>June 2019 -<br/>April 2020</b>         | <b>-1.564</b> | <b>-4.120</b> | <b>0.003</b>     |
| June 2019 -<br>June 2020                  | -1.018        | -2.944        | 0.176            |
| <b>June 2019 -<br/>July 2020</b>          | <b>-1.106</b> | <b>-3.419</b> | <b>0.046</b>     |
| June 2019 -<br>August<br>2020             | -0.385        | -1.131        | 0.999            |

|                                           |               |               |                  |
|-------------------------------------------|---------------|---------------|------------------|
| <b>June 2019 -<br/>September<br/>2020</b> | <b>-1.380</b> | <b>-4.299</b> | <b>0.002</b>     |
| <b>June 2019 -<br/>May 2021</b>           | <b>-1.918</b> | <b>-5.389</b> | <b>&lt;0.001</b> |
| <b>June 2019 -<br/>June 2021</b>          | <b>-2.026</b> | <b>-5.196</b> | <b>&lt;0.001</b> |
| June 2019 -<br>July 2021                  | -1.099        | -3.028        | 0.142            |
| <b>June 2019 -<br/>August<br/>2021</b>    | <b>-1.391</b> | <b>-4.139</b> | <b>0.003</b>     |
| <b>June 2019 -<br/>September<br/>2021</b> | <b>-1.194</b> | <b>-3.524</b> | <b>0.032</b>     |
| July 2019 -<br>August<br>2019             | -0.587        | -2.338        | 0.561            |
| <b>July 2019 -<br/>September<br/>2019</b> | <b>-1.104</b> | <b>-4.345</b> | <b>0.001</b>     |
| July 2019 -<br>April 2020                 | -0.749        | -2.392        | 0.521            |
| July 2019 -<br>June 2020                  | -0.204        | -0.742        | 1.000            |
| July 2019 -<br>July 2020                  | -0.292        | -1.198        | 0.997            |
| July 2019 -<br>August<br>2020             | 0.429         | 1.607         | 0.958            |
| July 2019 -<br>September<br>2020          | -0.566        | -2.342        | 0.559            |
| <b>July 2019 -<br/>May 2021</b>           | <b>-1.103</b> | <b>-3.869</b> | <b>0.009</b>     |
| <b>July 2019 -<br/>June 2021</b>          | <b>-1.212</b> | <b>-3.703</b> | <b>0.017</b>     |

|                                              |              |              |              |
|----------------------------------------------|--------------|--------------|--------------|
| July 2019 -<br>July 2021                     | -0.285       | -0.965       | 1.000        |
| July 2019 -<br>August<br>2021                | -0.577       | -2.190       | 0.672        |
| July 2019 -<br>September<br>2021             | -0.380       | -1.429       | 0.985        |
| August<br>2019 -<br>September<br>2019        | -0.517       | -2.348       | 0.554        |
| August<br>2019 - April<br>2020               | -0.162       | -0.553       | 1.000        |
| August<br>2019 - June<br>2020                | 0.383        | 1.527        | 0.972        |
| August<br>2019 - July<br>2020                | 0.296        | 1.367        | 0.990        |
| <b>August<br/>2019 -<br/>August<br/>2020</b> | <b>1.016</b> | <b>4.204</b> | <b>0.002</b> |
| August<br>2019 -<br>September<br>2020        | 0.021        | 0.101        | 1.000        |
| August<br>2019 - May<br>2021                 | -0.516       | -1.961       | 0.821        |
| August<br>2019 - June<br>2021                | -0.624       | -2.026       | 0.783        |
| August<br>2019 - July<br>2021                | 0.303        | 1.110        | 0.999        |

|                                                 |              |              |                  |
|-------------------------------------------------|--------------|--------------|------------------|
| August<br>2019 -<br>August<br>2021              | 0.011        | 0.045        | 1.000            |
| August<br>2019 -<br>September<br>2021           | 0.208        | 0.863        | 1.000            |
| September<br>2019 - April<br>2020               | 0.355        | 1.207        | 0.997            |
| <b>September<br/>2019 - June<br/>2020</b>       | <b>0.900</b> | <b>3.563</b> | <b>0.028</b>     |
| <b>September<br/>2019 - July<br/>2020</b>       | <b>0.813</b> | <b>3.720</b> | <b>0.016</b>     |
| <b>September<br/>2019 -<br/>August<br/>2020</b> | <b>1.533</b> | <b>6.300</b> | <b>&lt;0.001</b> |
| September<br>2019 -<br>September<br>2020        | 0.539        | 2.504        | 0.437            |
| September<br>2019 - May<br>2021                 | 0.001        | 0.004        | 1.000            |
| September<br>2019 - June<br>2021                | -0.107       | -0.346       | 1.000            |
| September<br>2019 - July<br>2021                | 0.820        | 2.991        | 0.157            |
| September<br>2019 -<br>August<br>2021           | 0.528        | 2.221        | 0.650            |
| September<br>2019 -                             | 0.725        | 2.998        | 0.154            |

|                                 |              |              |              |
|---------------------------------|--------------|--------------|--------------|
| September 2021                  |              |              |              |
| April 2020 - June 2020          | 0.545        | 1.812        | 0.894        |
| April 2020 - July 2020          | 0.458        | 1.669        | 0.943        |
| <b>April 2020 - August 2020</b> | <b>1.178</b> | <b>4.012</b> | <b>0.005</b> |
| April 2020 - September 2020     | 0.184        | 0.681        | 1.000        |
| April 2020 - May 2021           | -0.354       | -1.143       | 0.998        |
| April 2020 - June 2021          | -0.462       | -1.321       | 0.993        |
| April 2020 - July 2021          | 0.465        | 1.472        | 0.980        |
| April 2020 - August 2021        | 0.173        | 0.615        | 1.000        |
| April 2020 - September 2021     | 0.370        | 1.292        | 0.994        |
| June 2020 - July 2020           | -0.088       | -0.381       | 1.000        |
| June 2020 - August 2020         | 0.633        | 2.500        | 0.440        |
| June 2020 - September 2020      | -0.362       | -1.604       | 0.958        |
| June 2020 - May 2021            | -0.899       | -3.294       | 0.068        |
| June 2020 - June 2021           | -1.008       | -3.176       | 0.095        |

|                                                 |               |               |                  |
|-------------------------------------------------|---------------|---------------|------------------|
| June 2020 -<br>July 2021                        | -0.080        | -0.286        | 1.000            |
| June 2020 -<br>August<br>2021                   | -0.372        | -1.521        | 0.973            |
| June 2020 -<br>September<br>2021                | -0.176        | -0.703        | 1.000            |
| July 2020 -<br>August<br>2020                   | 0.721         | 3.252         | 0.077            |
| July 2020 -<br>September<br>2020                | -0.274        | -1.452        | 0.982            |
| July 2020 -<br>May 2021                         | -0.812        | -3.324        | 0.062            |
| July 2020 -<br>June 2021                        | -0.920        | -3.139        | 0.106            |
| July 2020 -<br>July 2021                        | 0.007         | 0.029         | 1.000            |
| July 2020 -<br>August<br>2021                   | -0.285        | -1.338        | 0.992            |
| July 2020 -<br>September<br>2021                | -0.088        | -0.404        | 1.000            |
| <b>August<br/>2020 -<br/>September<br/>2020</b> | <b>-0.995</b> | <b>-4.590</b> | <b>&lt;0.001</b> |
| <b>August<br/>2020 - May<br/>2021</b>           | <b>-1.532</b> | <b>-5.741</b> | <b>&lt;0.001</b> |
| <b>August<br/>2020 - June<br/>2021</b>          | <b>-1.640</b> | <b>-5.257</b> | <b>&lt;0.001</b> |

|                                  |               |               |              |
|----------------------------------|---------------|---------------|--------------|
| August 2020 - July 2021          | -0.713        | -2.595        | 0.373        |
| <b>August 2020 - August 2021</b> | <b>-1.005</b> | <b>-4.240</b> | <b>0.002</b> |
| August 2020 - September 2021     | -0.808        | -3.341        | 0.058        |
| September 2020 - May 2021        | -0.537        | -2.224        | 0.647        |
| September 2020 - June 2021       | -0.646        | -2.221        | 0.650        |
| September 2020 - July 2021       | 0.281         | 1.126         | 0.999        |
| September 2020 - August 2021     | -0.011        | -0.052        | 1.000        |
| September 2020 - September 2021  | 0.186         | 0.875         | 1.000        |
| May 2021 - June 2021             | -0.108        | -0.371        | 1.000        |
| May 2021 - July 2021             | 0.819         | 3.142         | 0.105        |
| May 2021 - August 2021           | 0.527         | 2.316         | 0.578        |
| May 2021 - September 2021        | 0.724         | 3.138         | 0.106        |



|                                       |        |        |       |
|---------------------------------------|--------|--------|-------|
| June 2021 -<br>July 2021              | 0.927  | 3.053  | 0.134 |
| June 2021 -<br>August<br>2021         | 0.635  | 2.306  | 0.586 |
| June 2021 -<br>September<br>2021      | 0.832  | 2.996  | 0.155 |
| July 2021 -<br>August<br>2021         | -0.292 | -1.237 | 0.996 |
| July 2021 -<br>September<br>2021      | -0.095 | -0.397 | 1.000 |
| August<br>2021 -<br>September<br>2021 | 0.197  | 0.998  | 1.000 |

**Supplementary Information Table 6:** Pairwise comparisons of the occurrence of delayed reproduction in single infested cells over the study period. Factors denoted in bold indicate significant differences between groups ( $p < 0.05$ ; Tukey-Method adjusted for comparing 15 estimates and averaged over recapping status of cells).

| <b>Contrast</b>                    | <b>Estimate</b> | <b>Z</b>      | <b>p</b>         |
|------------------------------------|-----------------|---------------|------------------|
| April 2019 -<br>June 2019          | -0.597          | -1.565        | 0.966            |
| April 2019 -<br>July 2019          | -0.757          | -2.062        | 0.760            |
| April 2019 -<br>August<br>2019     | -0.400          | -1.060        | 0.999            |
| April 2019 -<br>September<br>2019  | 0.013           | 0.031         | 1.000            |
| <b>April 2019 -<br/>April 2020</b> | <b>-1.562</b>   | <b>-4.043</b> | <b>0.005</b>     |
| <b>April 2019 -<br/>June 2020</b>  | <b>-1.727</b>   | <b>-4.808</b> | <b>&lt;0.001</b> |

|                                   |               |               |                  |
|-----------------------------------|---------------|---------------|------------------|
| April 2019 -<br>July 2020         | -0.948        | -2.678        | 0.319            |
| April 2019 -<br>August<br>2020    | -0.094        | -0.253        | 1.000            |
| April 2019 -<br>September<br>2020 | -0.651        | -1.802        | 0.898            |
| April 2019 -<br>May 2021          | -0.635        | -1.586        | 0.962            |
| April 2019 -<br>June 2021         | -1.336        | -3.238        | 0.080            |
| April 2019 -<br>July 2021         | -0.760        | -2.002        | 0.798            |
| April 2019 -<br>August<br>2021    | -0.214        | -0.565        | 1.000            |
| April 2019 -<br>September<br>2021 | -0.796        | -2.198        | 0.666            |
| June 2019 -<br>July 2019          | -0.160        | -0.654        | 1.000            |
| June 2019 -<br>August<br>2019     | 0.197         | 0.762         | 1.000            |
| June 2019 -<br>September<br>2019  | 0.610         | 1.990         | 0.805            |
| <b>June 2019 -<br/>April 2020</b> | <b>-0.965</b> | <b>-3.496</b> | <b>0.036</b>     |
| <b>June 2019 -<br/>June 2020</b>  | <b>-1.130</b> | <b>-4.789</b> | <b>&lt;0.001</b> |
| June 2019 -<br>July 2020          | -0.351        | -1.545        | 0.970            |
| June 2019 -<br>August<br>2020     | 0.503         | 2.007         | 0.795            |

|                                  |               |               |                  |
|----------------------------------|---------------|---------------|------------------|
| June 2019 -<br>September<br>2020 | -0.054        | -0.226        | 1.000            |
| June 2019 -<br>May 2021          | -0.038        | -0.128        | 1.000            |
| June 2019 -<br>June 2021         | -0.739        | -2.379        | 0.531            |
| June 2019 -<br>July 2021         | -0.163        | -0.613        | 1.000            |
| June 2019 -<br>August<br>2021    | 0.383         | 1.435         | 0.984            |
| June 2019 -<br>September<br>2021 | -0.199        | -0.824        | 1.000            |
| July 2019 -<br>August<br>2019    | 0.357         | 1.526         | 0.973            |
| July 2019 -<br>September<br>2019 | 0.769         | 2.690         | 0.311            |
| July 2019 -<br>April 2020        | -0.806        | -3.151        | 0.102            |
| <b>July 2019 -<br/>June 2020</b> | <b>-0.970</b> | <b>-4.591</b> | <b>&lt;0.001</b> |
| July 2019 -<br>July 2020         | -0.191        | -0.955        | 1.000            |
| July 2019 -<br>August<br>2020    | 0.663         | 2.918         | 0.188            |
| July 2019 -<br>September<br>2020 | 0.106         | 0.493         | 1.000            |
| July 2019 -<br>May 2021          | 0.122         | 0.445         | 1.000            |
| July 2019 -<br>June 2021         | -0.580        | -1.988        | 0.806            |

|                                         |               |               |                  |
|-----------------------------------------|---------------|---------------|------------------|
| July 2019 -<br>July 2021                | -0.004        | -0.016        | 1.000            |
| July 2019 -<br>August<br>2021           | 0.542         | 2.196         | 0.668            |
| July 2019 -<br>September<br>2021        | -0.040        | -0.182        | 1.000            |
| August<br>2019 -<br>September<br>2019   | 0.412         | 1.382         | 0.989            |
| <b>August<br/>2019 - April<br/>2020</b> | <b>-1.163</b> | <b>-4.312</b> | <b>0.002</b>     |
| <b>August<br/>2019 - June<br/>2020</b>  | <b>-1.327</b> | <b>-5.819</b> | <b>&lt;0.001</b> |
| August<br>2019 - July<br>2020           | -0.548        | -2.513        | 0.431            |
| August<br>2019 -<br>August<br>2020      | 0.306         | 1.259         | 0.996            |
| August<br>2019 -<br>September<br>2020   | -0.251        | -1.088        | 0.999            |
| August<br>2019 - May<br>2021            | -0.235        | -0.818        | 1.000            |
| August<br>2019 - June<br>2021           | -0.937        | -3.080        | 0.124            |
| August<br>2019 - July<br>2021           | -0.361        | -1.389        | 0.988            |

|                                            |               |               |                  |
|--------------------------------------------|---------------|---------------|------------------|
| August<br>2019 -<br>August<br>2021         | 0.185         | 0.710         | 1.000            |
| August<br>2019 -<br>September<br>2021      | -0.397        | -1.685        | 0.938            |
| <b>September<br/>2019 - April<br/>2020</b> | <b>-1.575</b> | <b>-5.020</b> | <b>&lt;0.001</b> |
| <b>September<br/>2019 - June<br/>2020</b>  | <b>-1.739</b> | <b>-6.235</b> | <b>&lt;0.001</b> |
| <b>September<br/>2019 - July<br/>2020</b>  | <b>-0.960</b> | <b>-3.540</b> | <b>0.031</b>     |
| September<br>2019 -<br>August<br>2020      | -0.106        | -0.364        | 1.000            |
| September<br>2019 -<br>September<br>2020   | -0.664        | -2.361        | 0.545            |
| September<br>2019 - May<br>2021            | -0.647        | -1.965        | 0.819            |
| <b>September<br/>2019 - June<br/>2021</b>  | <b>-1.349</b> | <b>-3.916</b> | <b>0.008</b>     |
| September<br>2019 - July<br>2021           | -0.773        | -2.533        | 0.416            |
| September<br>2019 -<br>August<br>2021      | -0.227        | -0.743        | 1.000            |
| September<br>2019 -                        | -0.809        | -2.851        | 0.220            |

|                                    |              |              |                  |
|------------------------------------|--------------|--------------|------------------|
| September 2021                     |              |              |                  |
| April 2020 - June 2020             | -0.164       | -0.683       | 1.000            |
| April 2020 - July 2020             | 0.615        | 2.637        | 0.345            |
| <b>April 2020 - August 2020</b>    | <b>1.469</b> | <b>5.751</b> | <b>&lt;0.001</b> |
| <b>April 2020 - September 2020</b> | <b>0.911</b> | <b>3.760</b> | <b>0.014</b>     |
| April 2020 - May 2021              | 0.928        | 3.104        | 0.117            |
| April 2020 - June 2021             | 0.226        | 0.716        | 1.000            |
| April 2020 - July 2021             | 0.802        | 2.967        | 0.167            |
| <b>April 2020 - August 2021</b>    | <b>1.348</b> | <b>5.051</b> | <b>&lt;0.001</b> |
| April 2020 - September 2021        | 0.766        | 3.137        | 0.106            |
| <b>June 2020 - July 2020</b>       | <b>0.779</b> | <b>4.219</b> | <b>0.002</b>     |
| <b>June 2020 - August 2020</b>     | <b>1.633</b> | <b>7.690</b> | <b>&lt;0.001</b> |
| <b>June 2020 - September 2020</b>  | <b>1.076</b> | <b>5.461</b> | <b>&lt;0.001</b> |
| <b>June 2020 - May 2021</b>        | <b>1.092</b> | <b>4.153</b> | <b>0.003</b>     |
| June 2020 - June 2021              | 0.390        | 1.385        | 0.989            |

|                                           |               |               |                  |
|-------------------------------------------|---------------|---------------|------------------|
| <b>June 2020 -<br/>July 2021</b>          | <b>0.966</b>  | <b>4.192</b>  | <b>0.003</b>     |
| <b>June 2020 -<br/>August<br/>2021</b>    | <b>1.513</b>  | <b>6.643</b>  | <b>&lt;0.001</b> |
| <b>June 2020 -<br/>September<br/>2021</b> | <b>0.930</b>  | <b>4.654</b>  | <b>&lt;0.001</b> |
| <b>July 2020 -<br/>August<br/>2020</b>    | <b>0.854</b>  | <b>4.203</b>  | <b>0.002</b>     |
| July 2020 -<br>September<br>2020          | 0.297         | 1.584         | 0.962            |
| July 2020 -<br>May 2021                   | 0.313         | 1.226         | 0.997            |
| July 2020 -<br>June 2021                  | -0.388        | -1.413        | 0.986            |
| July 2020 -<br>July 2021                  | 0.187         | 0.844         | 1.000            |
| July 2020 -<br>August<br>2021             | 0.734         | 3.328         | 0.061            |
| July 2020 -<br>September<br>2021          | 0.151         | 0.794         | 1.000            |
| August<br>2020 -<br>September<br>2020     | -0.557        | -2.595        | 0.373            |
| August<br>2020 - May<br>2021              | -0.541        | -1.959        | 0.823            |
| <b>August<br/>2020 - June<br/>2021</b>    | <b>-1.243</b> | <b>-4.219</b> | <b>0.002</b>     |

|                                 |        |        |       |
|---------------------------------|--------|--------|-------|
| August 2020 - July 2021         | -0.667 | -2.714 | 0.296 |
| August 2020 - August 2021       | -0.121 | -0.496 | 1.000 |
| August 2020 - September 2021    | -0.703 | -3.235 | 0.080 |
| September 2020 - May 2021       | 0.016  | 0.061  | 1.000 |
| September 2020 - June 2021      | -0.685 | -2.413 | 0.505 |
| September 2020 - July 2021      | -0.110 | -0.471 | 1.000 |
| September 2020 - August 2021    | 0.437  | 1.904  | 0.852 |
| September 2020 - September 2021 | -0.145 | -0.719 | 1.000 |
| May 2021 - June 2021            | -0.702 | -2.131 | 0.714 |
| May 2021 - July 2021            | -0.126 | -0.437 | 1.000 |
| May 2021 - August 2021          | 0.421  | 1.466  | 0.981 |
| May 2021 - September 2021       | -0.162 | -0.611 | 1.000 |



|                                        |              |              |              |
|----------------------------------------|--------------|--------------|--------------|
| June 2021 -<br>July 2021               | 0.576        | 1.889        | 0.859        |
| <b>June 2021 -<br/>August<br/>2021</b> | <b>1.122</b> | <b>3.686</b> | <b>0.019</b> |
| June 2021 -<br>September<br>2021       | 0.540        | 1.905        | 0.851        |
| July 2021 -<br>August<br>2021          | 0.546        | 2.132        | 0.714        |
| July 2021 -<br>September<br>2021       | -0.036       | -0.155       | 1.000        |
| August<br>2021 -<br>September<br>2021  | -0.582       | -2.557       | 0.400        |

**Supplementary Information Table 7:** Pairwise comparisons of the occurrence of missing males in single infested cells over the study period. Factors denoted in bold indicate significant differences between groups ( $p < 0.05$ ; Tukey-Method adjusted for comparing 15 estimates and averaged over recapping status of cells).

| <b>Contrast</b>                   | <b>Estimate</b> | <b>Z</b> | <b>p</b> |
|-----------------------------------|-----------------|----------|----------|
| April 2019 -<br>June 2019         | 0.261           | 0.549    | 1.000    |
| April 2019 -<br>July 2019         | 0.849           | 1.720    | 0.927    |
| April 2019 -<br>August<br>2019    | -0.151          | -0.351   | 1.000    |
| April 2019 -<br>September<br>2019 | 0.305           | 0.638    | 1.000    |
| April 2019 -<br>April 2020        | -0.456          | -0.943   | 1.000    |
| April 2019 -<br>June 2020         | -0.320          | -0.733   | 1.000    |

|                                   |        |        |       |
|-----------------------------------|--------|--------|-------|
| April 2019 -<br>July 2020         | 0.346  | 0.795  | 1.000 |
| April 2019 -<br>August<br>2020    | -0.136 | -0.329 | 1.000 |
| April 2019 -<br>September<br>2020 | 0.450  | 1.003  | 1.000 |
| April 2019 -<br>May 2021          | 0.307  | 0.586  | 1.000 |
| April 2019 -<br>June 2021         | 0.706  | 1.009  | 1.000 |
| April 2019 -<br>July 2021         | 0.397  | 0.798  | 1.000 |
| April 2019 -<br>August<br>2021    | 2.442  | 3.045  | 0.137 |
| April 2019 -<br>September<br>2021 | 0.323  | 0.719  | 1.000 |
| June 2019 -<br>July 2019          | 0.588  | 1.332  | 0.992 |
| June 2019 -<br>August<br>2019     | -0.412 | -1.110 | 0.999 |
| June 2019 -<br>September<br>2019  | 0.044  | 0.103  | 1.000 |
| June 2019 -<br>April 2020         | -0.717 | -1.642 | 0.950 |
| June 2019 -<br>June 2020          | -0.581 | -1.513 | 0.975 |
| June 2019 -<br>July 2020          | 0.085  | 0.223  | 1.000 |
| June 2019 -<br>August<br>2020     | -0.397 | -1.117 | 0.999 |

|                                  |        |        |       |
|----------------------------------|--------|--------|-------|
| June 2019 -<br>September<br>2020 | 0.189  | 0.476  | 1.000 |
| June 2019 -<br>May 2021          | 0.046  | 0.097  | 1.000 |
| June 2019 -<br>June 2021         | 0.445  | 0.669  | 1.000 |
| June 2019 -<br>July 2021         | 0.136  | 0.302  | 1.000 |
| June 2019 -<br>August<br>2021    | 2.181  | 2.814  | 0.239 |
| June 2019 -<br>September<br>2021 | 0.062  | 0.157  | 1.000 |
| July 2019 -<br>August<br>2019    | -1.000 | -2.585 | 0.380 |
| July 2019 -<br>September<br>2019 | -0.544 | -1.231 | 0.997 |
| July 2019 -<br>April 2020        | -1.306 | -2.873 | 0.209 |
| July 2019 -<br>June 2020         | -1.169 | -2.905 | 0.194 |
| July 2019 -<br>July 2020         | -0.504 | -1.267 | 0.995 |
| July 2019 -<br>August<br>2020    | -0.985 | -2.632 | 0.348 |
| July 2019 -<br>September<br>2020 | -0.400 | -0.963 | 1.000 |
| July 2019 -<br>May 2021          | -0.542 | -1.099 | 0.999 |
| July 2019 -<br>June 2021         | -0.143 | -0.211 | 1.000 |

|                                       |        |        |       |
|---------------------------------------|--------|--------|-------|
| July 2019 -<br>July 2021              | -0.453 | -0.971 | 1.000 |
| July 2019 -<br>August<br>2021         | 1.593  | 2.025  | 0.783 |
| July 2019 -<br>September<br>2021      | -0.526 | -1.260 | 0.996 |
| August<br>2019 -<br>September<br>2019 | 0.456  | 1.251  | 0.996 |
| August<br>2019 - April<br>2020        | -0.306 | -0.802 | 1.000 |
| August<br>2019 - June<br>2020         | -0.169 | -0.534 | 1.000 |
| August<br>2019 - July<br>2020         | 0.496  | 1.594  | 0.960 |
| August<br>2019 -<br>August<br>2020    | 0.015  | 0.053  | 1.000 |
| August<br>2019 -<br>September<br>2020 | 0.600  | 1.808  | 0.895 |
| August<br>2019 - May<br>2021          | 0.458  | 1.065  | 0.999 |
| August<br>2019 - June<br>2021         | 0.857  | 1.354  | 0.991 |
| August<br>2019 - July<br>2021         | 0.547  | 1.382  | 0.989 |

|                                              |              |              |              |
|----------------------------------------------|--------------|--------------|--------------|
| <b>August<br/>2019 -<br/>August<br/>2021</b> | <b>2.593</b> | <b>3.475</b> | <b>0.038</b> |
| August<br>2019 -<br>September<br>2021        | 0.474        | 1.406        | 0.987        |
| September<br>2019 - April<br>2020            | -0.762       | -1.749       | 0.918        |
| September<br>2019 - June<br>2020             | -0.625       | -1.643       | 0.949        |
| September<br>2019 - July<br>2020             | 0.040        | 0.107        | 1.000        |
| September<br>2019 -<br>August<br>2020        | -0.441       | -1.259       | 0.996        |
| September<br>2019 -<br>September<br>2020     | 0.144        | 0.368        | 1.000        |
| September<br>2019 - May<br>2021              | 0.002        | 0.004        | 1.000        |
| September<br>2019 - June<br>2021             | 0.401        | 0.600        | 1.000        |
| September<br>2019 - July<br>2021             | 0.091        | 0.204        | 1.000        |
| September<br>2019 -<br>August<br>2021        | 2.137        | 2.757        | 0.270        |
| September<br>2019 -                          | 0.018        | 0.045        | 1.000        |

|                                 |              |              |              |
|---------------------------------|--------------|--------------|--------------|
| September 2021                  |              |              |              |
| April 2020 - June 2020          | 0.136        | 0.353        | 1.000        |
| April 2020 - July 2020          | 0.802        | 2.096        | 0.738        |
| April 2020 - August 2020        | 0.321        | 0.901        | 1.000        |
| April 2020 - September 2020     | 0.906        | 2.286        | 0.601        |
| April 2020 - May 2021           | 0.763        | 1.579        | 0.963        |
| April 2020 - June 2021          | 1.163        | 1.733        | 0.923        |
| April 2020 - July 2021          | 0.853        | 1.888        | 0.860        |
| <b>April 2020 - August 2021</b> | <b>2.899</b> | <b>3.747</b> | <b>0.015</b> |
| April 2020 - September 2021     | 0.779        | 1.957        | 0.824        |
| June 2020 - July 2020           | 0.666        | 2.072        | 0.754        |
| June 2020 - August 2020         | 0.184        | 0.636        | 1.000        |
| June 2020 - September 2020      | 0.770        | 2.271        | 0.613        |
| June 2020 - May 2021            | 0.627        | 1.432        | 0.985        |
| June 2020 - June 2021           | 1.026        | 1.607        | 0.958        |

|                                        |              |              |              |
|----------------------------------------|--------------|--------------|--------------|
| June 2020 -<br>July 2021               | 0.717        | 1.778        | 0.907        |
| <b>June 2020 -<br/>August<br/>2021</b> | <b>2.762</b> | <b>3.695</b> | <b>0.018</b> |
| June 2020 -<br>September<br>2021       | 0.643        | 1.873        | 0.867        |
| July 2020 -<br>August<br>2020          | -0.481       | -1.689       | 0.937        |
| July 2020 -<br>September<br>2020       | 0.104        | 0.311        | 1.000        |
| July 2020 -<br>May 2021                | -0.038       | -0.088       | 1.000        |
| July 2020 -<br>June 2021               | 0.361        | 0.566        | 1.000        |
| July 2020 -<br>July 2021               | 0.051        | 0.128        | 1.000        |
| July 2020 -<br>August<br>2021          | 2.097        | 2.809        | 0.241        |
| July 2020 -<br>September<br>2021       | -0.022       | -0.066       | 1.000        |
| August<br>2020 -<br>September<br>2020  | 0.585        | 1.922        | 0.842        |
| August<br>2020 - May<br>2021           | 0.443        | 1.073        | 0.999        |
| August<br>2020 - June<br>2021          | 0.842        | 1.354        | 0.991        |

|                                  |              |              |              |
|----------------------------------|--------------|--------------|--------------|
| August 2020 - July 2021          | 0.532        | 1.421        | 0.986        |
| <b>August 2020 - August 2021</b> | <b>2.578</b> | <b>3.519</b> | <b>0.033</b> |
| August 2020 - September 2021     | 0.459        | 1.481        | 0.979        |
| September 2020 - May 2021        | -0.143       | -0.318       | 1.000        |
| September 2020 - June 2021       | 0.257        | 0.397        | 1.000        |
| September 2020 - July 2021       | -0.053       | -0.128       | 1.000        |
| September 2020 - August 2021     | 1.993        | 2.647        | 0.338        |
| September 2020 - September 2021  | -0.127       | -0.356       | 1.000        |
| May 2021 - June 2021             | 0.399        | 0.576        | 1.000        |
| May 2021 - July 2021             | 0.089        | 0.183        | 1.000        |
| May 2021 - August 2021           | 2.135        | 2.671        | 0.323        |
| May 2021 - September 2021        | 0.016        | 0.036        | 1.000        |



|                                       |        |        |       |
|---------------------------------------|--------|--------|-------|
| June 2021 -<br>July 2021              | -0.310 | -0.459 | 1.000 |
| June 2021 -<br>August<br>2021         | 1.736  | 1.878  | 0.865 |
| June 2021 -<br>September<br>2021      | -0.383 | -0.597 | 1.000 |
| July 2021 -<br>August<br>2021         | 2.046  | 2.621  | 0.355 |
| July 2021 -<br>September<br>2021      | -0.074 | -0.179 | 1.000 |
| August<br>2021 -<br>September<br>2021 | -2.119 | -2.822 | 0.235 |

**Supplementary Information Table 8:** Pairwise comparisons of the occurrence of REC in single infested cells over the study period. Factors denoted in bold indicate significant differences between groups ( $p < 0.05$ ; Tukey-Method adjusted for comparing 15 estimates and averaged over reproductive status of cells).

| <b>Contrast</b>                   | <b>Estimate</b> | <b>Z</b>      | <b>p</b>         |
|-----------------------------------|-----------------|---------------|------------------|
| April 2019 -<br>June 2019         | -0.549          | -2.299        | 0.591            |
| <b>April 2019 -<br/>July 2019</b> | <b>-1.735</b>   | <b>-7.048</b> | <b>&lt;0.001</b> |
| April 2019 -<br>August<br>2019    | -1.045          | -4.363        | 0.001            |
| April 2019 -<br>September<br>2019 | -0.490          | -1.948        | 0.829            |
| April 2019 -<br>April 2020        | 0.950           | 3.104         | 0.116            |
| April 2019 -<br>June 2020         | 0.333           | 1.364         | 0.990            |

|                                         |               |               |                  |
|-----------------------------------------|---------------|---------------|------------------|
| April 2019 -<br>July 2020               | -0.040        | -0.179        | 1.000            |
| April 2019 -<br>August<br>2020          | 0.238         | 1.071         | 0.999            |
| April 2019 -<br>September<br>2020       | 0.665         | 2.874         | 0.208            |
| April 2019 -<br>May 2021                | -0.754        | -2.611        | 0.362            |
| April 2019 -<br>June 2021               | -0.559        | -1.666        | 0.943            |
| April 2019 -<br>July 2021               | 0.106         | 0.394         | 1.000            |
| <b>April 2019 -<br/>August<br/>2021</b> | <b>1.513</b>  | <b>5.636</b>  | <b>&lt;0.001</b> |
| April 2019 -<br>September<br>2021       | 0.427         | 1.714         | 0.929            |
| <b>June 2019 -<br/>July 2019</b>        | <b>-1.186</b> | <b>-5.782</b> | <b>&lt;0.001</b> |
| June 2019 -<br>August<br>2019           | -0.496        | -2.502        | 0.439            |
| June 2019 -<br>September<br>2019        | 0.059         | 0.275         | 1.000            |
| <b>June 2019 -<br/>April 2020</b>       | <b>1.499</b>  | <b>5.332</b>  | <b>&lt;0.001</b> |
| June 2019 -<br>June 2020                | 0.883         | 4.205         | 0.002            |
| June 2019 -<br>July 2020                | 0.509         | 2.760         | 0.269            |
| June 2019 -<br>August<br>2020           | 0.788         | 4.300         | 0.002            |

|                                           |              |               |                  |
|-------------------------------------------|--------------|---------------|------------------|
| <b>June 2019 -<br/>September<br/>2020</b> | <b>1.214</b> | <b>6.330</b>  | <b>&lt;0.001</b> |
| June 2019 -<br>May 2021                   | -0.205       | -0.781        | 1.000            |
| June 2019 -<br>June 2021                  | -0.010       | -0.030        | 1.000            |
| June 2019 -<br>July 2021                  | 0.656        | 2.713         | 0.297            |
| <b>June 2019 -<br/>August<br/>2021</b>    | <b>2.062</b> | <b>8.530</b>  | <b>&lt;0.001</b> |
| <b>June 2019 -<br/>September<br/>2021</b> | <b>0.976</b> | <b>4.453</b>  | <b>0.001</b>     |
| <b>July 2019 -<br/>August<br/>2019</b>    | <b>0.690</b> | <b>3.453</b>  | <b>0.041</b>     |
| <b>July 2019 -<br/>September<br/>2019</b> | <b>1.245</b> | <b>5.799</b>  | <b>&lt;0.001</b> |
| <b>July 2019 -<br/>April 2020</b>         | <b>2.685</b> | <b>9.527</b>  | <b>&lt;0.001</b> |
| <b>July 2019 -<br/>June 2020</b>          | <b>2.068</b> | <b>9.761</b>  | <b>&lt;0.001</b> |
| <b>July 2019 -<br/>July 2020</b>          | <b>1.695</b> | <b>9.119</b>  | <b>&lt;0.001</b> |
| <b>July 2019 -<br/>August<br/>2020</b>    | <b>1.973</b> | <b>10.665</b> | <b>&lt;0.001</b> |
| <b>July 2019 -<br/>September<br/>2020</b> | <b>2.400</b> | <b>12.408</b> | <b>&lt;0.001</b> |
| <b>July 2019 -<br/>May 2021</b>           | <b>0.981</b> | <b>3.732</b>  | <b>0.016</b>     |
| <b>July 2019 -<br/>June 2021</b>          | <b>1.176</b> | <b>3.753</b>  | <b>0.015</b>     |

|                                                 |              |               |                  |
|-------------------------------------------------|--------------|---------------|------------------|
| <b>July 2019 -<br/>July 2021</b>                | <b>1.841</b> | <b>7.562</b>  | <b>&lt;0.001</b> |
| <b>July 2019 -<br/>August<br/>2021</b>          | <b>3.248</b> | <b>13.323</b> | <b>&lt;0.001</b> |
| <b>July 2019 -<br/>September<br/>2021</b>       | <b>2.162</b> | <b>9.771</b>  | <b>&lt;0.001</b> |
| August<br>2019 -<br>September<br>2019           | 0.554        | 2.773         | 0.261            |
| <b>August<br/>2019 - April<br/>2020</b>         | <b>1.994</b> | <b>7.228</b>  | <b>&lt;0.001</b> |
| <b>August<br/>2019 - June<br/>2020</b>          | <b>1.378</b> | <b>6.780</b>  | <b>&lt;0.001</b> |
| <b>August<br/>2019 - July<br/>2020</b>          | <b>1.005</b> | <b>5.733</b>  | <b>&lt;0.001</b> |
| <b>August<br/>2019 -<br/>August<br/>2020</b>    | <b>1.283</b> | <b>7.360</b>  | <b>&lt;0.001</b> |
| <b>August<br/>2019 -<br/>September<br/>2020</b> | <b>1.710</b> | <b>9.320</b>  | <b>&lt;0.001</b> |
| August<br>2019 - May<br>2021                    | 0.291        | 1.133         | 0.999            |
| August<br>2019 - June<br>2021                   | 0.486        | 1.576         | 0.964            |
| <b>August<br/>2019 - July<br/>2021</b>          | <b>1.151</b> | <b>4.864</b>  | <b>&lt;0.001</b> |

|                                                    |              |               |                  |
|----------------------------------------------------|--------------|---------------|------------------|
| <b>August<br/>2019 -<br/>August<br/>2021</b>       | <b>2.558</b> | <b>10.792</b> | <b>&lt;0.001</b> |
| <b>August<br/>2019 -<br/>September<br/>2021</b>    | <b>1.472</b> | <b>6.880</b>  | <b>&lt;0.001</b> |
| <b>September<br/>2019 - April<br/>2020</b>         | <b>1.440</b> | <b>5.062</b>  | <b>&lt;0.001</b> |
| <b>September<br/>2019 - June<br/>2020</b>          | <b>0.824</b> | <b>3.819</b>  | <b>0.011</b>     |
| September<br>2019 - July<br>2020                   | 0.450        | 2.374         | 0.534            |
| <b>September<br/>2019 -<br/>August<br/>2020</b>    | <b>0.729</b> | <b>3.865</b>  | <b>0.010</b>     |
| <b>September<br/>2019 -<br/>September<br/>2020</b> | <b>1.155</b> | <b>5.874</b>  | <b>&lt;0.001</b> |
| September<br>2019 - May<br>2021                    | -0.264       | -0.988        | 1.000            |
| September<br>2019 - June<br>2021                   | -0.068       | -0.216        | 1.000            |
| September<br>2019 - July<br>2021                   | 0.597        | 2.413         | 0.505            |
| <b>September<br/>2019 -<br/>August<br/>2021</b>    | <b>2.003</b> | <b>8.101</b>  | <b>&lt;0.001</b> |
| <b>September<br/>2019 -</b>                        | <b>0.917</b> | <b>4.066</b>  | <b>0.004</b>     |

|                               |               |               |                  |
|-------------------------------|---------------|---------------|------------------|
| <b>September 2021</b>         |               |               |                  |
| April 2020 - June 2020        | -0.616        | -2.266        | 0.616            |
| <b>April 2020 - July 2020</b> | <b>-0.990</b> | <b>-3.907</b> | <b>0.008</b>     |
| April 2020 - August 2020      | -0.711        | -2.808        | 0.242            |
| April 2020 - September 2020   | -0.285        | -1.098        | 0.999            |
| <b>April 2020 - May 2021</b>  | <b>-1.704</b> | <b>-5.511</b> | <b>&lt;0.001</b> |
| <b>April 2020 - June 2021</b> | <b>-1.508</b> | <b>-4.277</b> | <b>0.002</b>     |
| April 2020 - July 2021        | -0.843        | -2.895        | 0.198            |
| April 2020 - August 2021      | 0.563         | 1.937         | 0.834            |
| April 2020 - September 2021   | -0.523        | -1.923        | 0.842            |
| June 2020 - July 2020         | -0.374        | -2.139        | 0.709            |
| June 2020 - August 2020       | -0.095        | -0.543        | 1.000            |
| June 2020 - September 2020    | 0.332         | 1.808         | 0.896            |
| <b>June 2020 - May 2021</b>   | <b>-1.087</b> | <b>-4.326</b> | <b>0.001</b>     |
| June 2020 - June 2021         | -0.892        | -2.937        | 0.179            |

|                                           |               |               |                  |
|-------------------------------------------|---------------|---------------|------------------|
| June 2020 -<br>July 2021                  | -0.227        | -0.984        | 1.000            |
| <b>June 2020 -<br/>August<br/>2021</b>    | <b>1.179</b>  | <b>5.087</b>  | <b>&lt;0.001</b> |
| June 2020 -<br>September<br>2021          | 0.093         | 0.450         | 1.000            |
| July 2020 -<br>August<br>2020             | 0.279         | 1.968         | 0.817            |
| <b>July 2020 -<br/>September<br/>2020</b> | <b>0.705</b>  | <b>4.654</b>  | <b>&lt;0.001</b> |
| July 2020 -<br>May 2021                   | -0.714        | -3.086        | 0.122            |
| July 2020 -<br>June 2021                  | -0.519        | -1.801        | 0.898            |
| July 2020 -<br>July 2021                  | 0.147         | 0.705         | 1.000            |
| <b>July 2020 -<br/>August<br/>2021</b>    | <b>1.553</b>  | <b>7.435</b>  | <b>&lt;0.001</b> |
| July 2020 -<br>September<br>2021          | 0.467         | 2.566         | 0.393            |
| August<br>2020 -<br>September<br>2020     | 0.427         | 2.822         | 0.235            |
| <b>August<br/>2020 - May<br/>2021</b>     | <b>-0.992</b> | <b>-4.293</b> | <b>0.002</b>     |
| August<br>2020 - June<br>2021             | -0.797        | -2.765        | 0.266            |

|                                     |               |               |                  |
|-------------------------------------|---------------|---------------|------------------|
| August 2020 - July 2021             | -0.132        | -0.638        | 1.000            |
| <b>August 2020 - August 2021</b>    | <b>1.274</b>  | <b>6.136</b>  | <b>&lt;0.001</b> |
| August 2020 - September 2021        | 0.188         | 1.041         | 0.999            |
| <b>September 2020 - May 2021</b>    | <b>-1.419</b> | <b>-5.951</b> | <b>&lt;0.001</b> |
| <b>September 2020 - June 2021</b>   | <b>-1.224</b> | <b>-4.167</b> | <b>0.003</b>     |
| September 2020 - July 2021          | -0.559        | -2.591        | 0.376            |
| <b>September 2020 - August 2021</b> | <b>0.848</b>  | <b>3.912</b>  | <b>0.008</b>     |
| September 2020 - September 2021     | -0.238        | -1.248        | 0.996            |
| May 2021 - June 2021                | 0.195         | 0.669         | 1.000            |
| <b>May 2021 - July 2021</b>         | <b>0.860</b>  | <b>3.689</b>  | <b>0.018</b>     |
| <b>May 2021 - August 2021</b>       | <b>2.267</b>  | <b>9.381</b>  | <b>&lt;0.001</b> |
| <b>May 2021 - September 2021</b>    | <b>1.181</b>  | <b>5.435</b>  | <b>&lt;0.001</b> |



|                                                 |               |               |                  |
|-------------------------------------------------|---------------|---------------|------------------|
| June 2021 -<br>July 2021                        | 0.665         | 2.350         | 0.553            |
| <b>June 2021 -<br/>August<br/>2021</b>          | <b>2.072</b>  | <b>7.132</b>  | <b>&lt;0.001</b> |
| <b>June 2021 -<br/>September<br/>2021</b>       | <b>0.986</b>  | <b>3.646</b>  | <b>0.021</b>     |
| <b>July 2021 -<br/>August<br/>2021</b>          | <b>1.406</b>  | <b>6.473</b>  | <b>&lt;0.001</b> |
| July 2021 -<br>September<br>2021                | 0.320         | 1.668         | 0.943            |
| <b>August<br/>2021 -<br/>September<br/>2021</b> | <b>-1.086</b> | <b>-5.543</b> | <b>&lt;0.001</b> |

**Supplementary Information Table 9:** Schedule of picture trials (7 pictures per trial) and subsequent sampling of brood combs for later investigations. Picture intervals partly match with brood termination protocols of OECD guideline 75 [1]. Note that brood fixation day (BFD) is the day of egg laying according to [1].

| <b>Picture No.</b>              | <b>Days relative to capping (<math>\pm 1</math> day)</b> | <b>Expected brood stadium</b> | <b>OECD 75 [1]</b> |
|---------------------------------|----------------------------------------------------------|-------------------------------|--------------------|
| 1                               | -2                                                       | Old larvae                    | -                  |
| 2                               | 0                                                        | Sealed brood                  | -                  |
| 3                               | 2                                                        | Sealed brood                  | BFD +10            |
| 4                               | 4                                                        | Sealed brood                  | -                  |
| 5                               | 6                                                        | Sealed brood                  | -                  |
| 6                               | 8                                                        | Sealed brood                  | BFD +16            |
| 7<br>sampling of<br>brood combs | 10                                                       | Sealed brood                  | -                  |

## References

1. OECD (2014), *Guidance Document on the Honey Bee (Apis Mellifera L.) Brood test Under Semi-field Conditions*, OECD Series on Testing and Assessment, No. 75, OECD Publishing, Paris, <https://doi.org/10.1787/9789264085510-en>
